# Supplementary material for: Impact of Aqueous Extract Artemisia Herba‐Alba Leaves as a Green Inhibitor against Acid Activation of 2024 Aluminum Alloy
Source: Hindawi journal article supplement (doi:10.1155/2024/5432109), 2024-01-01
Supplement: f1 [file 5432109.f1.docx]

**SUPPLEMENTARY MATERIALS**

Impact of aqueous extract Artemisia herba-alba leaves as a green inhibitor against acid activation of 2024 aluminum alloy

**Nacer Hechiche1. Gérald Culioli2. Abdelaziz Kadri1.Dalila Boughrara1. Amar Saal3 .F.Xavier Perrin4**

1Laboratoire de physique et chimie des matériaux, Université Mouloud Mammeri, Tizi-Ouzou, Algéria

2 Institut Méditerranéen de Biodiversité et d’Ecologie Marine et Continentale, UMR CNRS‑IRD, Aix-Marseille Université, Avignon, France

3 Laboratoire de Chimie Théorique Computationnelle Et Photonique, USTHB, Algiers , Algeria

**Contents**

1. **Adsorption isotherms**
2. **Actual free energy of adsorption for natural extracts**
3. **Chemical compounds detected by LC-MS/MS**
4. **Adsorption isotherms**

In addition to Langmuir isotherm, the following adsorption models were tested to evaluate the model that best fits the surface coverage data:

Temkin isotherm

(1)

Freundlich isotherm

(2)

Frumkin isotherm

(3)

Where Kads is the adsorption equilibrium constant (in L/g), C the mass concentration, f the molecular interaction parameter between corrosion inhibitor molecules and n the Freundlich empirical constant.


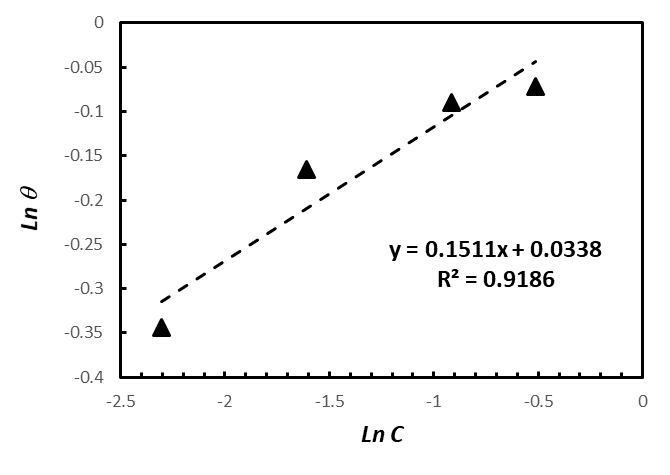


**(b)**

# **Figure S1 .** Linearized (a) Temkin isotherm, (b) Freundlich isotherm, and (c) Frumkin isotherm (temperature: 25 °C)

1. **Actual free energy of adsorption for natural extracts**

The molar concentration of the active inhibitor molecule, c is given by Equation (4),

c= (4)

where x is the weight fraction of the active inhibitor in the natural extract, C is the mass concentration (in g/L) of the natural extract and Minh is the molecular weight of the inhibitor.

The adsorptive equilibrium constant (Kads,1) in L g-1 is thus related to the adsorptive equilibrium constant (Kads,2) in L mol-1 through Equation (5) :

(5)

The free adsorption enthalpies defined from the mass or molar concentrations are given in Equation (6) and (7), respectively :

(6)

(7)

with

To compare the relative values of and it is sufficient to compare the exponential terms:

we can anticipate that will be greater than and therefore that will be more negative than given that Minh > and x<1.

The actual free energy of adsorption is more negative than the value calculated from mass concentrations of the aqueous extract of AHA (-25.3 kJ.mol-1). A simple calculation based on isofraxidin as the only active compound in the extract and present at 10% by mass in the extract conducted by example at a G°ads,2 value of -37.2 kJ mol-1.

1. **Chemical compounds detected by LC-MS/MS**

**Table S1** Chemical compounds detected by LC-MS/MS of the AEAHA

| ***m/z***  **(+ mode)** | **RT (min)** | **Ion formula** | **Mass error (ppm)** | **mσa** | **Putative annotation** |
| --- | --- | --- | --- | --- | --- |
|
| 156.0423 | 0.7 | C5H6N3O3 | -9.6 | 26.3 | - |
| 118.0864 | 0.72 | C5H12NO2 | -1.0 | 8.2 | Valine |
| 124.0395 | 0.80 | C6H6NO2 | -1.9 | 7.5 | Nicotinic acid |
| 102.0551 | 0.80 | C4H8NO2 | -1.3 | 3.4 | - |
| 132.1021 | 0.85 | C6H14NO2 | +0.2 | 7.3 | Isoleucine/leucine |
| 127.0503 | 0.89 | C5H7N2O2 | +0.8 | 3.5 | Thymine |
| 267.1590 | 1.65 | C15H23O4 | +0.5 | 7.1 | Sesquiterpene (Deoxyartemisinin or isomer) |
| 137.0597 | 1.69 | C8H9O2 | +0.1 | 3.4 | 4-Hydroxyacetophenone |
| 167.1066 | 1.71 | C10H15O2 | +0.1 | 16.3 | Monoterpene |
| 265.1437 | 1.98 | C15H21O4 | -1.2 | n.d.b | Sesquiterpene (Ludovicin B, Barrelin or isomer) |
| 121.0649 | 2.02 | C8H9O | +0.5 | 13.5 | Acetophenone |
| 153.1275 | 2.23 | C10H17O | +0.1 | 3.3 | Monoterpene (Thuyone or isomer) |
| 257.1024 | 2.26 | C12H17O6 | -1.6 | 6.6 | - |
| 185.1173 | 3.43 | C10H17O3 | -0.6 | 7.2 | Monoterpene |
| 225.1097 | 3.45 | C12H17O4 | +11.1 | 19.7 | - |
| 257.1021 | 3.62 | C12H17O6 | -1.0 | 8.1 | - |
| 155.1067 | 3.77 | C9H15O2 | -1.4 | 5.3 | - |
| 137.0600 | 5.07 | C8H9O2 | -1.1 | 4.4 | - |
| 267.1593 | 5.22 | C15H23O4 | -0.8 | 7.5 | Sesquiterpene (Deoxyartemisinin or isomer) |
| 265.1433 | 5.43 | C15H21O4 | -0.7 | n.d. | Sesquiterpene (Ludovicin B, Barrelin or isomer) |
| 283.1543 | 5.78 | C15H23O5 | -0.1 | 33.8 | Sesquiterpene (Artemisinin or isomer) |
| 181.0858 | 6.11 | C10H13O3 | +0.8 | 25.8 | Monoterpene |
| 315.1440 | 6.46 | C15H23O7 | -0.4 | 7.4 | Sesquiterpene |
| 285.1696 | 7.38 | C15H25O5 | +0.1 | 5.0 | Sesquiterpene (Dihydroartemisinin or isomer) |
| 227.1277 | 7.63 | C12H19O4 | +0.2 | 15.6 | - |
| 135.1168 | 7.70 | C10H15 | +0.3 | 4.7 | Monoterpene |
| 183.1014 | 7.81 | C10H15O3 | +0.7 | n.d. | Monoterpene |
| 121.1011 | 7.87 | C9H13 | -1.9 | 26.2 | - |
| 185.1172 | 8.07 | C10H17O3 | +0.4 | 6.8 | Monoterpene |
| 181.0859 | 8.26 | C10H13O3 | +0.3 | 10.6 | Monoterpene |
| 229.1435 | 8.40 | C12H21O4 | -0.5 | 10.3 | - |
| 414.2120 | 8.44 | C20H32NO8 | +0.7 | 19.0 | - |
| 285.1697 | 8.48 | C15H25O5 | -0.3 | 24.2 | Sesquiterpene (Dihydroartemisinin or isomer) |
| 595.1654 | 8.53 | C27H31O15 | +0.5 | 7.6 | Flavonoid (Vicenin-2) |
| 179.1066 | 8.66 | C11H15O2 | +0.6 | 5.1 | - |
| 193.0500 | 8.73 | C10H9O4 | +0.1 | 6.1 | Coumarin (Scopoletin) |
| 565.1556 | 8.79 | C26H29O14 | -0.8 | 4.4 | Flavonoid (Schaftoside/Isoschaftoside) |
| 249.1487 | 8.83 | C15H21O3 | -0.7 | n.d. |  |
| 565.1552 | 8.91 | C26H29O14 | -0.1 | 1.0 | Flavonoid (Schaftoside/Isoschaftoside) |
| 149.0960 | 8.92 | C10H13O | +0.6 | 1.4 | Monoterpene |
| 208.1332 | 8.94 | C12H18NO2 | 0.0 | 7.1 | - |
| 267.1587 | 9.04 | C15H23O4 | +1.0 | 15.6 | Sesquiterpene (Deoxyartemisinin or isomer) |
| 223.0599 | 9.14 | C11H11O5 | +0.4 | 11.8 | Coumarin (Fraxidin/Isofraxidin) |
| 231.1380 | 9.15 | C15H19O2 | -0.1 | 11.2 | Sesquiterpene (10-epi-Gazaniolide or isomer) |
| 163.1117 | 9.22 | C11H15O | +0.3 | 2.6 | - |
| 433.1136 | 9.24 | C21H21O10 | -1.6 | 3.3 | Flavonoid (Vitexin/Isovitexin) |
| 569.3310 | 9.31 | C30H49O10 | +1.8 | 5.2 | Sesquiterpene (C15H24O5) (observed as dimer) (Dihydroartemisinin or isomer) |
| 285.1694 | 9.37 | C15H25O5 | +1.0 | 9.6 | Sesquiterpene (Dihydroartemisinin or isomer) |
| 265.1434 | 9.53 | C15H21O4 | +0.0 | n.d. | Sesquiterpene (Ludovicin B, Barrelin or isomer) |
| 299.1483 | 9.62 | C15H23O6 | +2.1 | 15.5 | Sesquiterpene (Hydroxyartemisin or isomer) |
| 799.4637 | 9.67 | C45H67O12 | -1.2 | 65.3 | Sesquiterpene (C15H22O4) (observed as trimer) (Deoxyartemisinin or isomer) |
| 231.1380 | 9.75 | C15H19O2 | -0.3 | n.d. | Sesquiterpene (10-epi-Gazaniolide or isomer) |
| 167.1067 | 9.81 | C10H15O2 | -0.2 | n.d. | Monoterpene |
| 219.1743 | 9.83 | C15H23O | 0.0 | 9.7 | Sesquiterpene (Artemisinic aldehyde or isomer) |
| 265.1436 | 9.85 | C15H21O4 | -0.6 | n.d. | Sesquiterpene (Ludovicin B, Barrelin or isomer) |
| 308.1852 | 9.96 | C17H26NO4 | +0.2 | 12.5 | - |
| 533.3116 | 9.98 | C30H45O8 | -1.3 | 6.7 | Sesquiterpene (C15H22O4) (observed as dimer) (Deoxyartemisinin or isomer) |
| 249.1482 | 10.05 | C15H21O3 | +1.4 | 28.0 | Sesquiterpene |
| 267.1589 | 10.23 | C15H23O4 | +0.6 | 4.4 | Sesquiterpene (Deoxyartemisinin or isomer) |
| 177.0544 | 10.31 | C10H9O3 | +1.4 | 0.4 | Monoterpene |
| 151.1117 | 10.37 | C10H15O | -1.3 | 14.9 | Monoterpene |
| 251.1642 | 10.46 | C15H23O3 | 0.0 | 10.3 | Sesquiterpene (Artabin, Temisin or isomer) |
| 167.0701 | 10.57 | C10H15O2 | +1.4 | 17.8 | Monoterpene |
| 151.1116 | 10.59 | C10H15O | +1.2 | 8.3 | Monoterpene |
| 447.2381 | 10.62 | C25H35O7 | -0.7 | 36.2 | - |
| 333.2633 | 10.72 | C18H37O5 | +0.8 | 5.3 | - |
| 301.0713 | 10.79 | C16H13O6 | -0.4 | 7.8 | Flavonoid (Hispidulin, Cirsiliol, Tectorigenin or isomer) |
| 331.0814 | 10.85 | C17H15O7 | -0.4 | 9.7 | Flavonoid (Jaceosidin, Iristectorigenin or isomer) |
| 247.1324 | 10.90 | C15H19O3 | +0.9 | 12.9 | Sesquiterpene (Santonin, Lumisantonin or isomer) |
| 271.1882 | 10.97 | C15H27O4 | +8.1 | 6.3 | Sesquiterpene |
| 361.0918 | 11.02 | C18H17O8 | -0.2 | 7.7 | Flavonoid (Irigenin or isomer) |
| 251.1641 | 11.03 | C15H23O3 | +0.3 | 8.9 | Sesquiterpene (Artabin, Temisin or isomer) |
| 347.1856 | 11.14 | C20H27O5 | -0.8 | n.d. | Diterpene |
| 203.1796 | 11.18 | C15H23 | -0.6 | 3.5 | Sesquiterpene |
| 135.1166 | 11.23 | C10H15 | +4.7 | n.d. | Monoterpene |
| 345.0974 | 11.40 | C18H17O7 | -1.6 | 8.0 | Flavonoid (Cirsilineol, Eupatilin or isomer) |
| 221.1900 | 11.49 | C15H25O | +0.1 | 7.2 | Sesquiterpene (Artemisinic alcohol or isomer) |
| 249.1487 | 11.51 | C15H21O3 | -0.5 | n.d. | Sesquiterpene (Taurin, Artemorin or isomer) |
| 375.1078 | 11.53 | C19H19O8 | -1.0 | 3.4 | Flavonoid (Casticin or isomer) |
| 333.2067 | 11.75 | C20H29O4 | -1.9 | n.d. | Diterpene |
| 219.1747 | 11.79 | C15H23O | 2.3 | 14.6 | Sesquiterpene (Artemisinic aldehyde or isomer) |
| 233.1543 | 11.81 | C15H21O2 | -3.1 | 8.1 | Sesquiterpene (dihydroartemisinic acid or isomer) |

aConstructor statistical match factor (comparison of theoretical and experimental isotopic patterns). bn.d.: Not determined.
